# Supplementary material for: Psychological outcomes of low-dose CT lung cancer screening in a multisite demonstration screening pilot: the Lung Screen Uptake Trial (LSUT)
Source: PubMed Central journal article supplement (PMC7677470; doi:10.1136/thoraxjnl-2020-215054), 2020-10-21
Supplement: thoraxjnl-2020-215054supp001.pdf [file thoraxjnl-2020-215054supp001.pdf]

**Supplementary Table 1** Frequencies and multivariable logistic regression for scoring above threshold for moderate/severe anxiety among screening sample

|                                         | Anxiety T <sub>0</sub> |                 |                           | Anxiety T <sub>2</sub> |                 |                  |
|-----------------------------------------|------------------------|-----------------|---------------------------|------------------------|-----------------|------------------|
|                                         | %(n)                   | %(n)            | aOR (95% CI)              | %(n)                   | %(n)            | aOR (95% CI)     |
|                                         | Normal/Mild            | Moderate/Severe |                           | Normal/ Mild           | Moderate/Severe |                  |
| <b>Gender</b>                           |                        |                 |                           |                        |                 |                  |
| Male                                    | 93.6 (368)             | 6.4 (25)        | 1.00                      | 88.2 (194)             | 11.8 (26)       | 1.00             |
| Female                                  | 82.6 (290)             | 17.4 (61)       | <b>2.83 (1.70,4.71)**</b> | 79.8 (150)             | 20.2 (38)       | 2.23 (0.97,5.12) |
| <b>Age</b>                              |                        |                 |                           |                        |                 |                  |
| -                                       | -                      | -               | 0.92 (0.86,0.99)          | -                      | -               | 0.90 (0.79,1.01) |
| <b>Ethnicity</b>                        |                        |                 |                           |                        |                 |                  |
| White                                   | 88.6 (560)             | 11.4 (72)       | 1.00                      | 83.7 (313)             | 16.3 (61)       | 1.00             |
| Minority ethnic group                   | 87.3 (96)              | 12.7 (14)       | 1.23 (0.63,2.41)          | 90.9 (30)              | 9.1 (3)         | 0.20 (0.04,1.09) |
| <b>Education</b>                        |                        |                 |                           |                        |                 |                  |
| Left school ≤ age 15                    | 88.2 (320)             | 11.8 (43)       | 1.00                      | 81.7 (138)             | 18.3 (31)       | 1.00             |
| CSEs/O levels                           | 89.7 (70)              | 10.3 (8)        | 0.61 (0.25,1.45)          | 83.0 (39)              | 17.0 (8)        | 2.34 (0.68,8.08) |
| A levels/Further/Other                  | 84.6 (110)             | 15.4 (20)       | 1.28 (0.69,2.38)          | 81.7 (67)              | 18.3 (15)       | 0.99 (0.36,2.74) |
| University degree                       | 91.3 (157)             | 8.7 (15)        | 0.81 (0.42,1.56)          | 90.9 (100)             | 9.1 (10)        | 0.32 (0.10,1.06) |
| <b>Employment status</b>                |                        |                 |                           |                        |                 |                  |
| Retired                                 | 87.6 (397)             | 12.4 (56)       | 1.00                      | 82.6 (218)             | 17.4 (46)       | 1.00             |
| Employed                                | 93.5 (203)             | 6.5 (14)        | 0.42 (0.22,0.81)          | 89.9 (98)              | 10.1 (11)       | 0.58 (0.21,1.57) |
| Unemployed/Disabled/<br>Homemaker/Other | 75.5 (40)              | 24.5 (13)       | 1.53 (0.71,3.27)          | 76.9 (20)              | 23.1 (6)        | 0.31 (0.05,1.82) |
| <b>Marital status</b>                   |                        |                 |                           |                        |                 |                  |
| Married/cohabiting                      | 89.4 (294)             | 10.6 (35)       | 1.00                      | 87.8 (158)             | 12.2 (22)       | 1.00             |
| Not married/cohabiting                  | 87.7 (362)             | 12.3 (51)       | 1.04 (0.64,1.69)          | 81.5 (185)             | 18.5 (42)       | 1.72 (0.75,3.91) |
| <b>Smoking status</b>                   |                        |                 |                           |                        |                 |                  |
| Current smoker                          | 88.5 (452)             | 11.5 (59)       | 1.00                      | 83.6 (219)             | 16.4 (43)       | 1.00             |
| Former smoker                           | 88.7 (205)             | 11.3 (26)       | 1.12 (0.67,1.87)          | 85.5 (124)             | 14.5 (21)       | 1.14 (0.50,2.61) |

NOTE: aOR = adjusted odds ratio; 95% CI = 95% Confidence Intervals; \* p < .01, \*\* p < .001; Models adjusted for gender, age, ethnicity, education, employment status, marital status, smoking status, and T<sub>0</sub> psychological outcome scores.

**Supplementary Table 2** Frequencies and multivariable logistic regression for scoring above threshold for moderate/severe depression among screening sample

|                                         | Depression T <sub>0</sub> |                 |                          | Depression T <sub>2</sub> |                 |                   |
|-----------------------------------------|---------------------------|-----------------|--------------------------|---------------------------|-----------------|-------------------|
|                                         | %(n)                      | %(n)            | aOR (95% CI)             | aOR (95% CI)              |                 |                   |
|                                         | Normal/ Mild              | Moderate/Severe |                          | Normal/ Mild              | Moderate/Severe |                   |
| <b>Gender</b>                           |                           |                 |                          |                           |                 |                   |
| Male                                    | 94.6 (384)                | 5.4 (22)        | 1.00                     | 93.4 (211)                | 6.6 (15)        | 1.00              |
| Female                                  | 93.7 (327)                | 6.3 (22)        | 0.89 (0.46,1.71)         | 93.0 (173)                | 7.0 (12)        | 0.78 (0.26,2.34)  |
| <b>Age</b>                              | -                         | -               | <b>0.86 (0.78,0.96)*</b> | -                         | -               | 1.01 (0.86,1.19)  |
| <b>Ethnicity</b>                        |                           |                 |                          |                           |                 |                   |
| White                                   | 93.8 (600)                | 6.3 (40)        | 1.00                     | 93.4 (351)                | 6.6 (25)        | 1.00              |
| Minority ethnic group                   | 96.5 (110)                | 3.5 (4)         | 0.47 (0.16,1.42)         | 91.4 (32)                 | 8.6 (3)         | 1.11 (0.20,6.07)  |
| <b>Education</b>                        |                           |                 |                          |                           |                 |                   |
| Left school ≤ age 15                    | 95.3 (344)                | 4.7 (17)        | 1.00                     | 91.5 (162)                | 8.5 (15)        | 1.00              |
| CSEs/O levels                           | 89.7 (70)                 | 10.3 (8)        | 1.67 (0.63,4.39)         | 87.0 (40)                 | 13.0 (6)        | 1.50 (0.31,7.20)  |
| A levels/Further/Other                  | 93.5 (129)                | 6.5 (9)         | 1.35 (0.56,3.25)         | 96.2 (76)                 | 3.8 (3)         | 0.23 (0.04,1.44)  |
| University degree                       | 94.4 (167)                | 5.6 (10)        | 1.54 (0.65,3.61)         | 96.4 (106)                | 3.6 (4)         | 0.25 (0.04,1.47)  |
| <b>Employment status</b>                |                           |                 |                          |                           |                 |                   |
| Retired                                 | 94.6 (435)                | 5.4 (25)        | 1.00                     | 91.6 (240)                | 8.4 (22)        | 1.00              |
| Employed                                | 97.7 (215)                | 2.3 (5)         | 0.26 (0.10,0.72)         | 98.2 (108)                | 1.8 (2)         | 1.00 (0.18,5.60)  |
| Unemployed/Disabled/<br>Homemaker/Other | 75.5 (40)                 | 24.6 (13)       | <b>3.19 (1.39,7.35)*</b> | 85.7 (24)                 | 14.3 (4)        | 1.98 (0.31,12.80) |
| <b>Marital status</b>                   |                           |                 |                          |                           |                 |                   |
| Married/cohabiting                      | 95.0 (321)                | 5.0 (17)        | 1.00                     | 95.6 (175)                | 4.4 (8)         | 1.00              |
| Not married/cohabiting                  | 93.5 (388)                | 6.5 (27)        | 1.24 (0.64,2.40)         | 91.2 (208)                | 8.8 (20)        | 1.34 (0.42,4.25)  |
| <b>Smoking status</b>                   |                           |                 |                          |                           |                 |                   |
| Current smoker                          | 93.6 (482)                | 6.4 (33)        | 1.00                     | 91.6 (240)                | 8.4 (22)        | 1.00              |
| Former smoker                           | 95.4 (226)                | 4.6 (11)        | 0.76 (0.36,1.61)         | 96.0 (143)                | 4.0 (6)         | 0.75 (0.22,2.55)  |

NOTE: aOR = adjusted odds ratio; 95% CI = 95% Confidence Intervals; \* p < .01, \*\* p < .001; Models adjusted for gender, age, ethnicity, education, employment status, marital status, smoking status, and T<sub>0</sub> psychological outcome scores.

**Supplementary Table 3** Frequencies and multivariable logistic regression for scoring above threshold for moderate/severe anxiety and depression

|                                 | Community sample | Negative LDCT scan | Indeterminate Nodule | Suspicious Thoracic Lesion | Incidental finding (GP) | Incidental finding (Hospital) | No LDCT scan    |
|---------------------------------|------------------|--------------------|----------------------|----------------------------|-------------------------|-------------------------------|-----------------|
| <b>Anxiety T<sub>2</sub></b>    |                  |                    |                      |                            |                         |                               |                 |
| Normal/Mild, % (n)              | 94.3 (362)       | 83.5 (81)          | 73.3 (44)            | 77.8 (14)                  | 90.0 (126)              | 100.0 (16)                    | 81.5 (53)       |
| Moderate/Severe, % (n)          | 5.7 (22)         | 16.5 (18)          | 26.7 (16)            | 22.2 (4)                   | 10.0 (14)               | 0.0 (0)                       | 18.5 (12)       |
| Moderate/Severe, aOR            | 1.00             | 2.55               | 3.31                 | 6.80                       | 2.07                    | -                             | 6.26            |
| (95% CI)                        |                  | (0.80 to 8.09)     | (1.01 to 10.78)      | (0.80 to 57.67)            | (0.71 to 6.02)          | -                             | (1.54 to 25.43) |
| <b>Depression T<sub>2</sub></b> |                  |                    |                      |                            |                         |                               |                 |
| Normal/Mild, % (n)              | 91.9 (353)       | 94.4 (101)         | 91.5 (54)            | 77.8 (14)                  | 95.8 (136)              | 100.0 (18)                    | 89.7 (81)       |
| Moderate/Severe, % (n)          | 8.1 (31)         | 5.6 (6)            | 8.5 (5)              | 22.2 (4)                   | 4.2 (6)                 | 0.0 (0)                       | 10.3 (7)        |
| Moderate/Severe, aOR            | 1.00             | 1.77               | 0.43                 | <b>17.61*</b>              | 1.08                    | -                             | 3.06            |
| (95% CI)                        |                  | (0.38 to 8.19)     | (0.05 to 3.46)       | <b>(2.26 to 137.00)</b>    | (0.27 to 4.22)          | -                             | (0.49 to 19.11) |

NOTE: aOR = adjusted odds ratio; 95% CI = 95% Confidence Intervals; \* p < .01, \*\* p < .001; Models adjusted for gender, age, ethnicity, education, employment status, marital status, smoking status, and T<sub>0</sub> psychological outcome scores.
